# Supplementary material for: European Roma groups show complex West Eurasian admixture footprints and a common South Asian genetic origin
Source: PubMed Central journal article supplement (PMC6779411; doi:10.1371/journal.pgen.1008417), 2019-09-23

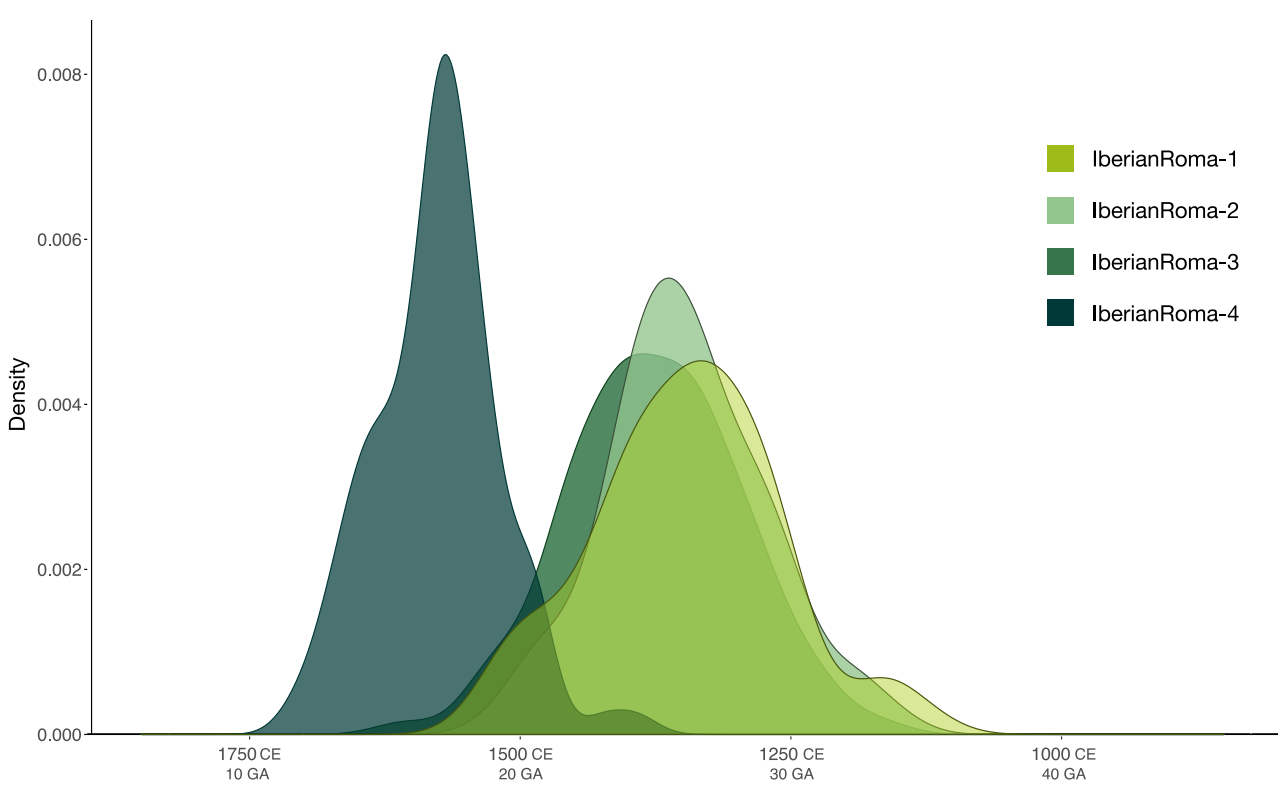

Supplement: pgen.1008417.s020.pdf [file pgen.1008417.s020.pdf]
