# Supplementary material for: European Roma groups show complex West Eurasian admixture footprints and a common South Asian genetic origin
Source: PLoS Genet. 2019 Sep 23;15(9):e1008417. doi: 10.1371/journal.pgen.1008417 (PMC6779411; doi:10.1371/journal.pgen.1008417)
Supplement: S2 Table — (XLSX) [file pgen.1008417.s025.xlsx]

## Sheet: Sheet1
Table S2. Total Variance Distance and p-values between pairs of European Roma clusters (after Bonferroni correction)
		RomaMix-1	RomaMix-2	RomaMix-3	RomaUkr	RomaSlo	RomaBalt	RomaIberia-1	RomaCro	RomaIberia-2	RomaMix-4
	RomaMix-1	-	0.0091 (0.9)	0.0243 (0)	0.0139 (0)	0.0160 (0)	0.0313 (0)	0.0327 (0)	0.0220 (0)	0.0796 (0)	0.0845 (0)
	RomaMix-2		-	0.0298 (0)	0.0205 (0)	0.0218 (0)	0.0365 (0)	0.0358 (0)	0.0277 (0)	0.0830 (0)	0.0897 (0)
	RomaMix-3			-	0.0138 (1)	0.0112 (1)	0.0141 (1)	0.0218 (0)	0.0094 (1)	0.0601 (0)	0.060 (0)
	RomaUkr				-	0.0087 (1)	0.0201 (1)	0.0282 (0)	0.0131 (1)	0.0693 (0)	0.0734 (0)
	RomaSlo					-	0.0168 (1)	0.0270 (0)	0.0121 (1)	0.0673 (0)	0.0704 (0)
	RomaBalt						-	0.0303 (0)	0.0168 (1)	0.0666 (0)	0.0581 (0)
	RomaIberia-1							-	0.0249 (0)	0.0486 (0)	0.0642 (0)
	RomaCro								-	0.0639 (0)	0.0659 (0)
	RomaIberia-2									-	0.0447 (1)
	RomaMix-4										-
