# Supplementary material for: European Roma groups show complex West Eurasian admixture footprints and a common South Asian genetic origin
Source: PLoS Genet. 2019 Sep 23;15(9):e1008417. doi: 10.1371/journal.pgen.1008417 (PMC6779411; doi:10.1371/journal.pgen.1008417)
Supplement: S4 Table — (XLSX) [file pgen.1008417.s027.xlsx]

## Sheet: Sheet1
Table S4. p-values resulting from Wilcoxon test (computed across individuals) of West Eurasian haplotype lengths for each pair of Indian clusters (after Bonferroni correction)
	Irula	E-India	NE-India1	NE-India2	NE-India3	Gujarati	Punjabi-1	Punjabi-2	Punjabi-3	Kusunda
Irula	-	1	1	0.0338792	1	0.00846979	0.0101637	0.00846979	0.00846979	0.00846979
E-India		-	1	2.42599e-08	0.000662529	1.55269e-15	5.20152e-15	2.15824e-13	1.55269e-15	1.55269e-15
NE-India1			-	1	0.000390913	2.93805e-08	1.58263e-06	1	6.529e-10	6.529e-10
NE-India2				-	1	0.000390913	0.000508187	0.000390913	0.000390913	0.000390913
NE-India3					-	1	0.00450977	5.97404e-07	2.28776e-06	6.529e-10
Gujarati						-	0.0508187	7.4979e-06	2.6116e-09	1.3058e-09
Punjabi-1							-	0.0584416	6.529e-10	6.529e-10
Punjabi-2								-	0.203275	0.000155346
Punjabi-3									-	0.0508187
Kusunda										-
