# Supplementary material for: European Roma groups show complex West Eurasian admixture footprints and a common South Asian genetic origin
Source: PLoS Genet. 2019 Sep 23;15(9):e1008417. doi: 10.1371/journal.pgen.1008417 (PMC6779411; doi:10.1371/journal.pgen.1008417)
Supplement: S10 Table — (XLSX) [file pgen.1008417.s033.xlsx]

## Sheet: Sheet1
Table S10. Total Variance Distance and p-values between pairs of Iberian Roma clusters (after Bonferroni correction)
		IberianRoma-1	IberianRoma-2	IberianRoma-3	IberianRoma-4
	IberianRoma-1	-	0.0168 (1)	0.0166 (0.87)	0.0525 (0.000)
	IberianRoma-2		-	0.0185 (0.198)	0.0591 (0.000)
	IberianRoma-3		-	-	0.0618 (0.000)
	IberianRoma-4				-
